# Supplementary material for: Growth Performance, Bone Development and Phosphorus Metabolism in Chicks Fed Diets Supplemented with Phytase Are Associated with Alterations in Gut Microbiota
Source: MDPI journal article supplement (doi:10.3390/ani12070940), 2022-04-06
Supplement: s1 [file s1]

## Supplemental Material

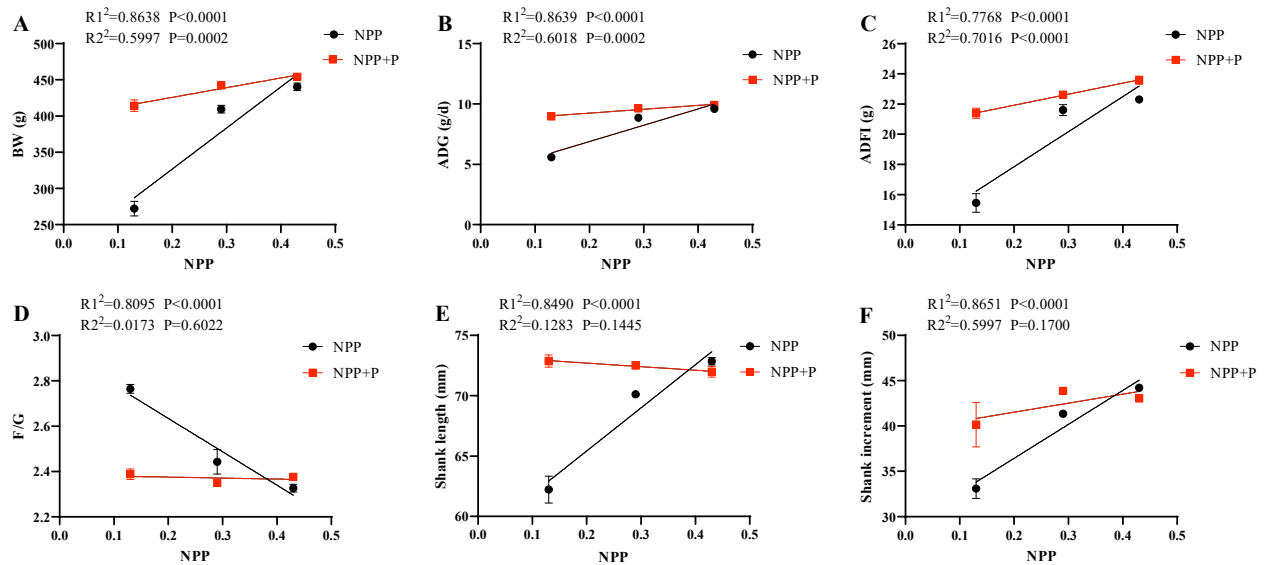

**Figure S1. Regression equation between different levels of dietary phosphorus and growth performance and bone development with or without phytase of layers. (A) BW (B)ADG (C) ADFI (D) F/G (E) Shank length (F) Shank increment.** BW = body weight, ADG = average daily gain; ADFI = average daily feed intake; F/G = the ratio of feed to gain. Data are shown as mean  $\pm$  SEM. n = 6 per group.

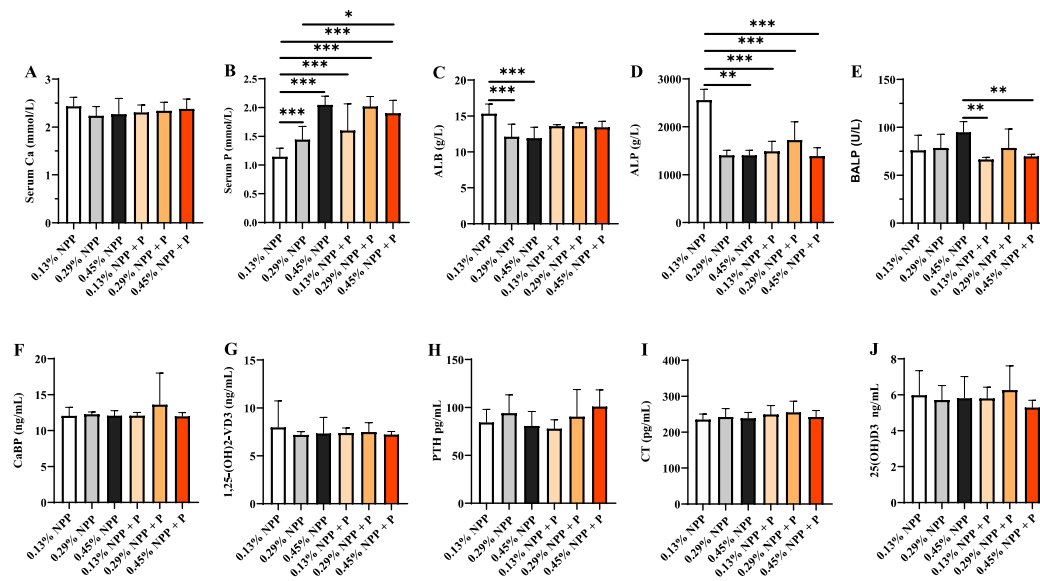

**Figure S2. Effects of different levels of dietary phosphorus with phytase on serum biochemical index of layers at 2 weeks of age.** (A) Serum Ca (B) Serum phosphorus (C) ALB (D) ALP (E) BALP (F) CaBP (G) 1,25(OH)2D3 (H) PTH (I) CT (J) 25(OH)D3. Data are shown as mean  $\pm$  SEM. \*  $P < 0.05$ , \*\*  $P < 0.01$ , \*\*\*  $P < 0.001$ , \*\*\*\*  $P < 0.0001$ .  $n = 6$  per group.

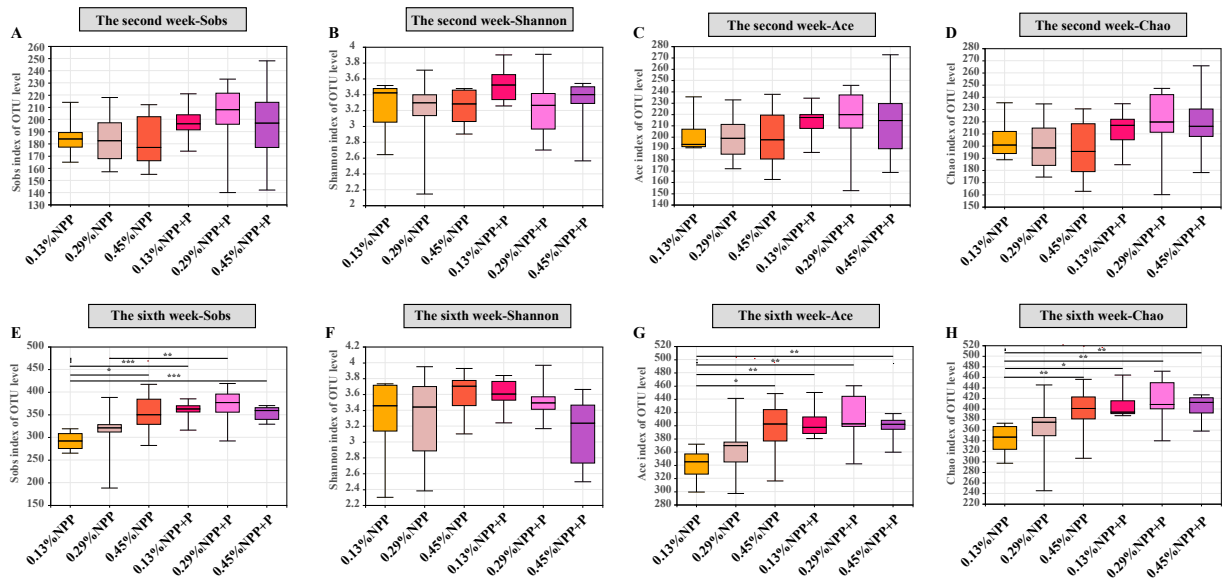

**Figure S3. Effects of different levels of dietary phosphorus with phytase on alpha diversity of layers.** (A) Sob index at 2 weeks of age (B) Shannon index at 2 weeks of age (C) Ace index at 2 weeks of age (D) Chaos index at 2 weeks of age (E) Sob index at 6 weeks of age (F) Shannon index at 6 weeks of age (G) Ace index at 6 weeks of age (H) Chaos index at 2 weeks of age Data are shown as mean  $\pm$  SEM. \*  $P < 0.05$ , \*\*  $P < 0.01$ , \*\*\*  $P < 0.001$ .  $n = 6$  per group.

**Table S1. Effects of interaction between different levels of phosphorus and phytase on growth performance of chicks during brooding period**

| Items           |             | BW g                | ADG g/d           | ADFI g/d           | F/G               |
|-----------------|-------------|---------------------|-------------------|--------------------|-------------------|
| NPP             | 0.13%       | 343.23 <sup>c</sup> | 7.28 <sup>c</sup> | 18.42 <sup>c</sup> | 2.58 <sup>a</sup> |
|                 | 0.29%       | 425.96 <sup>b</sup> | 9.25 <sup>b</sup> | 22.17 <sup>b</sup> | 2.40 <sup>b</sup> |
|                 | 0.45%       | 447.15 <sup>a</sup> | 9.75 <sup>a</sup> | 22.94 <sup>a</sup> | 2.35 <sup>b</sup> |
| Phytase         | 0           | 374.00 <sup>b</sup> | 8.01 <sup>b</sup> | 19.79 <sup>b</sup> | 2.51 <sup>a</sup> |
|                 | 200         | 436.90 <sup>a</sup> | 9.51 <sup>a</sup> | 22.54 <sup>a</sup> | 2.37 <sup>b</sup> |
| SEM             |             | 6.25                | 0.16              | 0.36               | 0.03              |
| <i>P</i> -value | NPP         | <0.01               | <0.01             | <0.01              | <0.01             |
|                 | Phytase     | <0.01               | <0.01             | <0.01              | <0.01             |
|                 | NPP×Phytase | <0.01               | <0.01             | <0.01              | <0.01             |

Data are shown as mean ± SEM. *n* = 6 per group. Different letters signify significantly different groups (*P* < 0.05). BW = body weight, ADG = average daily gain; ADFI = average daily feed intake; F/G = the ratio of feed to gain.

**Table S2. Effects of interaction between different levels of phosphorus and phytase on shank length and shank increment of chicks during brooding period**

|                 |             | 2wk                 |                    | 6wk                |                    |
|-----------------|-------------|---------------------|--------------------|--------------------|--------------------|
| Items           |             | Shank length        | Shank              | Shank length       | Shank              |
|                 |             | mm                  | increment mm       | mm                 | increment mm       |
| NPP             | 0.13%       | 42.33 <sup>b</sup>  | 14.31 <sup>c</sup> | 67.55 <sup>b</sup> | 36.62 <sup>b</sup> |
|                 | 0.29%       | 43.96 <sup>ab</sup> | 15.75 <sup>b</sup> | 71.32 <sup>a</sup> | 42.62 <sup>a</sup> |
|                 | 0.45%       | 45.00 <sup>a</sup>  | 17.41 <sup>a</sup> | 72.41 <sup>a</sup> | 43.63 <sup>a</sup> |
| Phytase         | 0           | 43.26               | 15.22              | 68.40 <sup>b</sup> | 39.55              |
|                 | 200         | 44.37               | 17.40              | 72.46 <sup>a</sup> | 42.35              |
| SEM             |             | 0.39                | 0.33               | 0.57               | 0.55               |
| <i>P</i> -value | NPP         | 0.02                | <0.01              | <0.01              | <0.01              |
|                 | Phytase     | 0.14                | <0.01              | <0.01              | <0.01              |
|                 | NPP×Phytase | 0.15                | <0.01              | <0.01              | <0.01              |

Data are shown as mean ± SEM. *n* = 6 per group. Different letters signify significantly different groups (*P* < 0.05).

**Table S3. Effects of interaction between different levels of phosphorus and phytase on serum indexes of chicks at 2 weeks of age**

| Items           |              | Ca<br>mmol/L | P<br>mmol/L       | ALB<br>g/L         | ALP<br>U/L           | BALP<br>U/L        | CaBP<br>ng/ml | 1,25(OH) <sub>2</sub> D <sub>3</sub><br>ng/ml | PTH<br>pg/ml | CT<br>pg/ml | 25(OH)D <sub>3</sub><br>ng/ml |
|-----------------|--------------|--------------|-------------------|--------------------|----------------------|--------------------|---------------|-----------------------------------------------|--------------|-------------|-------------------------------|
| NPP             | 0.13%        | 2.37         | 1.37 <sup>b</sup> | 14.44 <sup>a</sup> | 2025.40 <sup>a</sup> | 71.19              | 12.07         | 7.69                                          | 81.19        | 242.22      | 5.89                          |
|                 | 0.29%        | 2.29         | 1.73 <sup>a</sup> | 12.84 <sup>b</sup> | 1562.77 <sup>b</sup> | 78.58              | 12.96         | 7.34                                          | 92.27        | 248.79      | 5.99                          |
|                 | 0.45%        | 2.32         | 1.97 <sup>a</sup> | 12.67 <sup>b</sup> | 1398.15 <sup>b</sup> | 82.27              | 12.04         | 7.28                                          | 90.88        | 240.54      | 5.56                          |
| Phytase         | 0            | 2.31         | 1.54 <sup>b</sup> | 13.11              | 1789.46 <sup>a</sup> | 83.18 <sup>a</sup> | 12.14         | 7.51                                          | 86.43        | 238.78      | 5.83                          |
|                 | 200          | 2.34         | 1.84 <sup>a</sup> | 13.53              | 1534.75 <sup>b</sup> | 71.52 <sup>b</sup> | 12.56         | 7.37                                          | 89.80        | 248.92      | 5.79                          |
| SEM             |              | 0.08         | 0.10              | 0.42               | 81.20                | 4.44               | 0.51          | 0.45                                          | 7.00         | 8.73        | 0.39                          |
| <i>P</i> -value | NPP          | 0.66         | <0.01             | <0.01              | <0.01                | 0.11               | 0.41          | 0.75                                          | 0.28         | 0.63        | 0.57                          |
|                 | Phytase      | 0.69         | <0.01             | 0.29               | <0.01                | 0.01               | 0.51          | 0.77                                          | 0.58         | 0.18        | 0.89                          |
|                 | NPP× Phytase | 0.31         | <0.01             | <0.01              | <0.01                | 0.06               | 0.59          | 0.74                                          | 0.16         | 0.81        | 0.44                          |

Data are shown as mean ± SEM. *n* = 6 per group. Different letters signify significantly different groups (*P* < 0.05). ALB=Albumin, ALP=Alkaline Phosphatase, BALP= Bone Alkaline Phosphatase, CaBP=Calcium Binding Protein, CT=Calcitonin, PTH= Parathyroid Hormone.

**Table S4. Effects of interaction between different levels of phosphorus and phytase on serum indexes of chicks at the end of 6 weeks of age**

| Items           |              | Ca mmol/L         | P mmol/L          | ALB g/L | ALP U/L              | BALP U/L            | CaBP ng/ml         | 1,25(OH) <sub>2</sub> D <sub>3</sub> ng/ml | PTH pg/ml           | CT pg/ml | 25(OH)D <sub>3</sub> ng/ml |
|-----------------|--------------|-------------------|-------------------|---------|----------------------|---------------------|--------------------|--------------------------------------------|---------------------|----------|----------------------------|
| NPP             | 0.13%        | 2.89              | 1.47 <sup>b</sup> | 13.31   | 1356.71              | 125.55 <sup>b</sup> | 17.44 <sup>a</sup> | 9.47                                       | 105.84              | 322.82   | 8.01                       |
|                 | 0.29%        | 2.88              | 1.95 <sup>a</sup> | 13.76   | 1289.37              | 138.85 <sup>a</sup> | 18.21 <sup>a</sup> | 9.80                                       | 101.42              | 331.70   | 8.57                       |
|                 | 0.45%        | 2.94              | 1.84 <sup>a</sup> | 13.89   | 1156.79              | 95.14 <sup>c</sup>  | 14.02 <sup>b</sup> | 9.50                                       | 99.30               | 331.69   | 9.00                       |
| Phytase         | 0            | 2.98 <sup>a</sup> | 1.16 <sup>b</sup> | 13.37   | 1394.33 <sup>a</sup> | 124.20              | 18.63 <sup>a</sup> | 3.14 <sup>b</sup>                          | 121.79 <sup>a</sup> | 342.35   | 8.65                       |
|                 | 200          | 2.82 <sup>b</sup> | 1.87 <sup>a</sup> | 13.40   | 1140.91 <sup>b</sup> | 115.50              | 14.49 <sup>b</sup> | 10.04 <sup>a</sup>                         | 82.59 <sup>b</sup>  | 315.12   | 8.40                       |
| SEM             |              | 0.06              | 0.05              | 0.35    | 84.22                | 4.83                | 1.01               | 0.03                                       | 5.9                 | 15.85    | 0.58                       |
| <i>P</i> -value | NPP          | 0.69              | <0.01             | 0.25    | 0.08                 | <0.01               | <0.01              | 0.51                                       | 0.56                | 0.83     | 0.30                       |
|                 | Phytase      | 0.03              | <0.01             | 0.06    | <0.01                | 0.06                | <0.01              | <0.01                                      | <0.01               | 0.06     | 0.63                       |
|                 | NPP× Phytase | 0.13              | <0.01             | 0.56    | <0.01                | <0.01               | <0.01              | <0.01                                      | 0.08                | <0.01    | 0.29                       |

Data are shown as mean ± SEM. *n* = 6 per group. Different letters signify significantly different groups (*P* < 0.05). ALB=Albumin, ALP=Alkaline Phosphatase; BALP= Bone Alkaline Phosphatase, CaBP=Calcium Binding Protein, CT=Calcitonin, PTH= Parathyroid Hormone.

**Table S5. Effects of interaction between different levels of phosphorus and phytase on Apparent Total Digestibility and emission of Ca and P of chicks during brooding period**

| Items          |             | DM<br>digestibility % | ATTD of<br>Ca % | ATTD of<br>P %     | Ca emission<br>ratio % | Ca<br>emission/feed<br>g/kg | Daily Ca<br>emissions<br>g/d | P emission<br>ratio % | P<br>emission/feed<br>g/kg | Daily P<br>emissions<br>g/d |
|----------------|-------------|-----------------------|-----------------|--------------------|------------------------|-----------------------------|------------------------------|-----------------------|----------------------------|-----------------------------|
| NPP            | 0.13%       | 72.82 <sup>b</sup>    | 32.16           | 30.90 <sup>b</sup> | 67.83                  | 6.65 <sup>a</sup>           | 0.12                         | 71.70 <sup>a</sup>    | 3.16 <sup>a</sup>          | 0.09 <sup>ab</sup>          |
|                | 0.29%       | 75.08 <sup>a</sup>    | 38.58           | 58.36 <sup>a</sup> | 61.42                  | 5.90 <sup>b</sup>           | 0.13                         | 43.93 <sup>b</sup>    | 2.33 <sup>b</sup>          | 0.08 <sup>b</sup>           |
|                | 0.45%       | 75.09 <sup>a</sup>    | 34.49           | 54.17 <sup>a</sup> | 65.51                  | 6.68 <sup>a</sup>           | 0.15                         | 45.82 <sup>b</sup>    | 3.07 <sup>ab</sup>         | 0.10 <sup>a</sup>           |
| Phytase        | 0           | 74.43                 | 34.29           | 3.32               | 65.42                  | 6.47                        | 0.13                         | 53.35                 | 2.84                       | 0.08                        |
|                | 200         | 74.23                 | 35.71           | 52.30              | 64.29                  | 6.34                        | 0.14                         | 52.26                 | 2.84                       | 0.09                        |
| SEM            |             | 0.42                  | 3.06            | 5.45               | 1.42                   | 0.15                        | 0.003                        | 5.90                  | 0.29                       | 0.01                        |
| NPP            |             | <0.01                 | 0.15            | <0.01              | 0.15                   | 0.03                        | <0.01                        | <0.01                 | 0.07                       | 0.13                        |
| <i>P</i> value | Phytase     | 0.61                  | 0.60            | 0.49               | 0.60                   | 0.57                        | <0.01                        | 0.49                  | 0.83                       | 0.22                        |
|                | NPP×Phytase | 0.08                  | 0.09            | 0.18               | 0.09                   | 0.01                        | 0.02                         | 0.18                  | 0.28                       | 0.61                        |

Data are shown as mean ± SEM. n = 6 per group. Different letters signify significantly different groups ( $P < 0.05$ ). DM= dry matter; ATTD = Apparent Total Tract Digestibility.
